# Supplementary material for: An unprecedented 2D covalent organic framework with an htb net topology
Source: Royal Society of Chemistry journal article supplement (doi:10.1039/c9cc06780a), 2019-01-01
Supplement: c9cc06780a1.pdf [file c9cc06780a1.pdf]

Supporting Information for

# An unprecedented 2D covalent organic framework with an htb net topology

Song-Liang Cai,<sup>a,b</sup> Zi-Hao He,<sup>a</sup> Xin-Le Li,<sup>b</sup> Kai Zhang,<sup>a</sup> Sheng-Run Zheng,<sup>\*a</sup> Jun Fan,<sup>a</sup> Yi Liu<sup>\*b</sup> and Wei-Guang Zhang<sup>\*a</sup>

<sup>a</sup>School of Chemistry, South China Normal University, Guangzhou 510006, P. R. China

<sup>b</sup>The Molecular Foundry, Lawrence Berkeley National Laboratory, Berkeley, California 94720, United States

## Table of Contents

|                    |                                                                                                        |            |
|--------------------|--------------------------------------------------------------------------------------------------------|------------|
| <i>Section S1</i>  | <i>General information and synthetic procedures</i>                                                    | <i>S2</i>  |
| <i>Section S2</i>  | <i>Powder X-ray diffraction (PXRD) measurements</i>                                                    | <i>S5</i>  |
| <i>Section S3</i>  | <i>Crystal structure modeling</i>                                                                      | <i>S6</i>  |
| <i>Section S4</i>  | <i>Fourier-transform infrared (FT-IR) spectra</i>                                                      | <i>S8</i>  |
| <i>Section S5</i>  | <i>Solid-state nuclear magnetic resonance (SSNMR) spectroscopy</i>                                     | <i>S10</i> |
| <i>Section S6</i>  | <i>Scanning electron microscopy (SEM)</i>                                                              | <i>S11</i> |
| <i>Section S7</i>  | <i>Thermogravimetric analysis (TGA)</i>                                                                | <i>S12</i> |
| <i>Section S8</i>  | <i>Nitrogen adsorption–desorption measurement</i>                                                      | <i>S13</i> |
| <i>Section S9</i>  | <i>Fluorescence spectroscopy</i>                                                                       | <i>S14</i> |
| <i>Section S10</i> | <i>X-ray photoelectron spectroscopy (XPS)</i>                                                          | <i>S17</i> |
| <i>Section S11</i> | <i>Proton and carbon nuclear magnetic resonance (<sup>1</sup>H-NMR and <sup>13</sup>C-NMR) spectra</i> | <i>S18</i> |
| <i>Section S12</i> | <i>Mass spectra (MS)</i>                                                                               | <i>S22</i> |

## Section S1. General information and synthetic procedures.

**General information:** 5,6-dibromo-2-(3,5-dibromophenyl)-1*H*-benzimidazole (compound **1**)<sup>1</sup> and the benzimidazole-based tetra-aldehyde (BITA) building block<sup>2</sup> were prepared according to the modified literature procedures. All the other chemicals were of analytical grade quality purchased from commercial sources and were used directly without further purification. Elemental analysis (C, H, and N) of the **htb** type BITA-DPA COF was carried out on a Perkin Elmer 2400 Series II elemental analyzer. Low-dose TEM image of the **htb** type BITA-DPA COF was acquired on the TEAM I FEI Titan-class microscope at 300 kV, equipped with both geometric aberrations corrected to third order and chromatic aberrations corrected to the first order. Imaging datum was collected in the Gatan K2 direct-detection camera operated in electron-counting mode (camera counting frame rate of 400 fps (frames per second) at 4 k × 4 k resolution) with a final image output rate of 40 fps at 4 k X 4 k resolution. High resolution transmission electron (HRTEM) image of the **htb** type BITA-DPA COF was measured on an FEI TitanX 60 300 microscope at 200 kV. The BITA-DPA COF sample was sonicated in toluene with a sonication probe for about 15 min and drop-casted onto a copper grid (Lacey C only, 300 mesh Cu). While the other instrument information were given separately in the following sections.

### Synthesis of 5,6-dibromo-2-(3,5-dibromophenyl)-1*H*-benzimidazole (**1**)

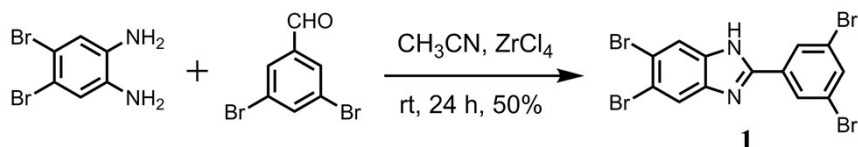

Scheme S1. Synthesis of compound **1**.

4,5-dibromobenzene-1,2-diamine (917 mg, 3.45 mmol) and 3,5-dibromobenzaldehyde (1093 mg, 4.14 mmol) were dissolved in acetonitrile (60 mL), and then zirconium tetrachloride (40 mg, 0.17 mmol) was added. The resulting mixture was stirred at room temperature for 24 h, during which a yellow precipitate was formed. The yellow solid was filtered and washed with cold acetonitrile several times. The crude product was further purified by recrystallization from DMSO to produce the desired compound **1** as brown prismatic crystals (880 mg, yield: 50%). <sup>1</sup>H NMR (DMSO-*d*<sub>6</sub>, 298 K, 400 MHz): δ (ppm) = 8.35 (d, *J* = 1.7 Hz, 2H), 8.04 (s, 2H), 8.02 (t, *J* = 1.7 Hz, 1H). <sup>13</sup>C NMR (DMSO-*d*<sub>6</sub>, 298 K, 100 MHz): δ (ppm) = 150.4, 134.8, 132.8, 128.3, 123.0, 116.9. MS (LC-MS) for C<sub>13</sub>H<sub>6</sub>Br<sub>4</sub>N<sub>2</sub> (Calcd. 509.82): *m/z* = 510.64 [M + H]<sup>+</sup>.

## Synthesis of the building block BITA

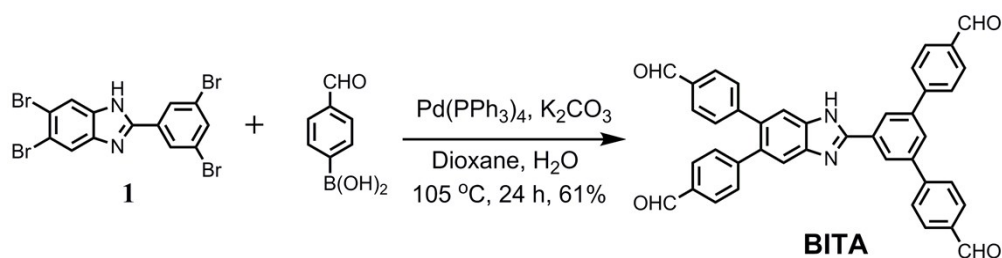

**Scheme S2.** Synthesis of the building block BITA.

A mixture of compound **1** (510 mg, 1.0 mmol), 4-formylphenylboronic acid (900 mg, 6.0 mmol),  $\text{K}_2\text{CO}_3$  (1382 mg, 10 mmol), dioxane (20 mL) and water (5 mL) was degassed with argon. Then tetrakis(triphenylphosphine)palladium (150 mg, catalyst) was added, and the reaction mixture was heated at  $105\text{ }^\circ\text{C}$  for 24 h under stirring. After cooling to room temperature, the mixture was evaporated to dryness under reduced pressure. The residue was dissolved in DMF and then filtered through a pad of Celatom, and the resulting filtrate was finally poured into methanol under stirring. The precipitation that formed was collected by vacuum filtration, washed with water, dioxane, and methanol, respectively, offering the building block BITA as a light green solid (373 mg, 61% yield based on compound **1**).  $^1\text{H}$  NMR (DMSO- $d_6$ , 298 K, 400 MHz):  $\delta$  (ppm) = 13.40 (s, 1H), 10.10 (s, 2H), 9.97 (s, 2H), 8.64 (s, 2H), 8.24 (s, 1H), 8.16 (d,  $J = 8.0$  Hz, 4H), 8.08 (d,  $J = 8.1$  Hz, 4H), 7.80 (dd,  $J = 12.8, 5.8$  Hz, 5H), 7.63 (s, 1H), 7.38 (t,  $J = 6.5$  Hz, 4H).  $^{13}\text{C}$  NMR (DMSO- $d_6$ , 298 K, 100 MHz):  $\delta$  (ppm) = 192.7, 152.5, 147.8, 144.8, 140.2, 135.5, 134.1, 133.9, 131.2, 130.7, 130.1, 129.2, 127.7, 127.2, 125.1. MS (LC-MS) for  $\text{C}_{41}\text{H}_{26}\text{N}_2\text{O}_4$  (Calcd. 610.67):  $m/z = 609.04$  [ $\text{M} - \text{H}$ ] $^-$ .

## Synthesis of the htb type BITA-PDA COF

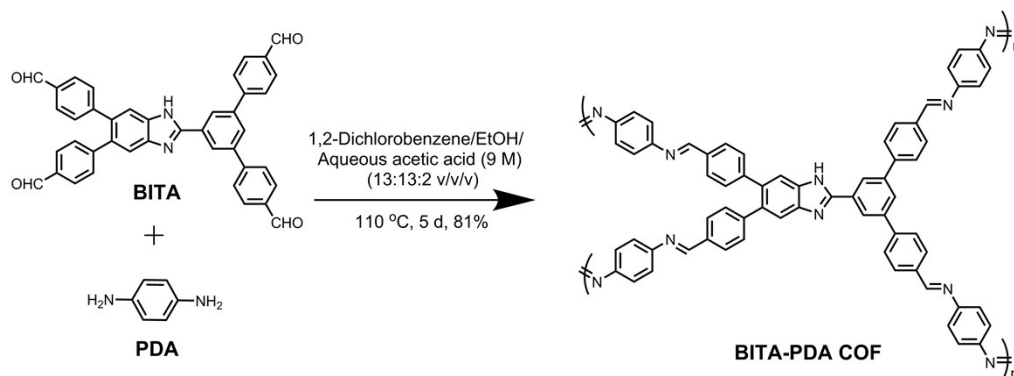

**Scheme S3.** Synthesis of the **htb** type BITA-PDA COF.

A mixture of the building block BITA (15.3 mg, 0.025 mmol), PDA (10.8 mg, 0.10 mmol), 1,2-dichlorobenzene (0.65 mL), and ethanol (0.65 mL) was placed in a 10 mL vial, firstly sonicated for 2 minutes and then bubbled with argon for 5 minutes, after which degassed 9 M acetic acid (0.1 mL) was added. The reaction mixture was bubbled again with argon for 15 minutes and the vial was sealed quickly, heated to 110 °C for 5 days under autogenously pressure. After naturally cooling to room temperature, the green precipitate was collected by filtration, washed with anhydrous THF several times and anhydrous acetone once, and finally dried under vacuum overnight, producing a green solid of the target **htb** type BITA-PDA COF (15.3 mg, 81% yield based on BITA). Elemental analysis: Calcd. for  $C_{53}H_{34}N_6$ : C, 84.33; H, 4.54; N, 11.13%. Found: C, 76.35; H, 4.93; N, 10.62%.

## Section S2. Powder X-ray diffraction (PXRD) measurements.

Powder X-ray diffraction (PXRD) patterns were collected on a Bruker D8 Advance diffractometer at 40 kV, 40 mA utilizing Cu-K $\alpha$  radiation ( $\lambda = 1.5418 \text{ \AA}$ ) at ambient temperature. Samples were mounted on zero-background quartz sample holders and flattened with a glass microscope slide. No sample grinding or sieving was done prior to the measurements.

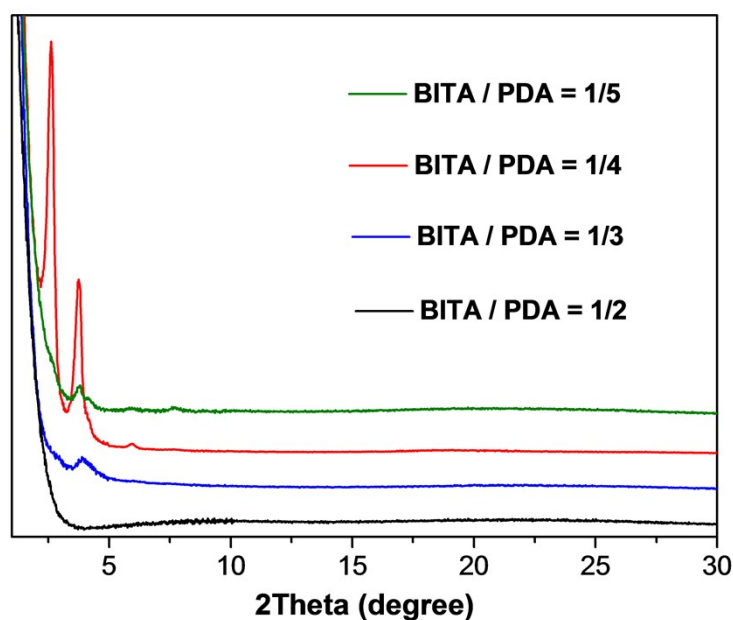

**Figure S1.** PXRD patterns for the BITA-PDA COF materials prepared from the reactions of BITA and PDA in different mole ratios using 1,2-dichlorobenzene/ethanol (1:1 v/v) as the cosolvents.

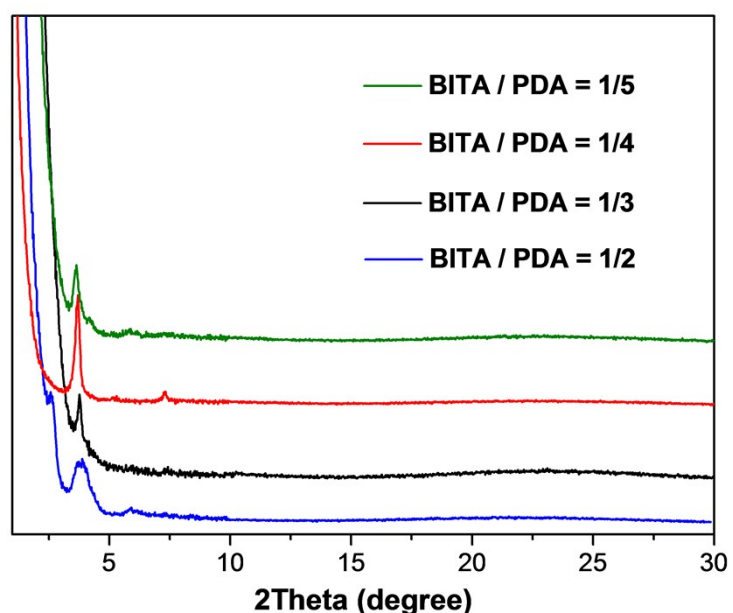

**Figure S2.** PXRD patterns for the BITA-PDA COF materials prepared from the reactions of BITA and PDA in different mole ratios using 1,2-dichlorobenzene/tert-butanol (1:1 v/v) as the cosolvents.

### Section 3. Crystal structure modeling.

The crystal structure modeling for **htb** type BITA-DPA COF, including the unit cell parameters and the atomic positions were simulated by utilizing the Crystal Building module in Accelrys Materials Studio 5.0 software<sup>3</sup> (Biovia, San Diego, CA). In the very first place, the AA packing model of BITA-DPA COF was constructed based on a 2D layered **htb** topology obtained from the Reticular Chemistry Structure Resource (RCSR)<sup>4</sup> by replacing the relevant vertex and edge with the BITA and PDA subunits, in which the symmetry of lattice was slightly degraded to  $P6/m$ . All hydrogen atoms were also added in the structure and the resulting lattice model was then geometrically optimized by employing the MS Forcite module (universal force fields, Ewald summations), thus generating a hexagonal unit cell with the optimized parameters of  $a = b = 70.26 \text{ \AA}$ ,  $c = 3.44 \text{ \AA}$ ,  $\alpha = \beta = 90^\circ$  and  $\gamma = 120^\circ$ . Last but not least, the Pawley PXRD refinement was carried out using the MS Reflex module, in which a Pseudo-Voigt profile function was employed for whole profile fitting (peak asymmetry, peak broadening, and zero shift error were all taken into consideration) and Berrar–Baldinozzi function was utilized for asymmetry correction during the refinement process. Unit cell parameters were refined at same time, yielding the final unit cell parameters of  $a = b = 72.87 \text{ \AA}$ ,  $c = 3.24 \text{ \AA}$ ,  $\alpha = \beta = 90^\circ$  and  $\gamma = 120^\circ$ , and the final  $R_p$  and  $R_{wp}$  of 3.17% and 4.48%, respectively. Moreover, the AB packing structure model for BITA-DPA COF was built as well, in which alternating stacked units were offset by  $a/2$  and  $b/2$ . Atomic coordinates of the **htb** type BITA-DPA COF with AA packing and AB packing structures are provided in Tables S1-S2.

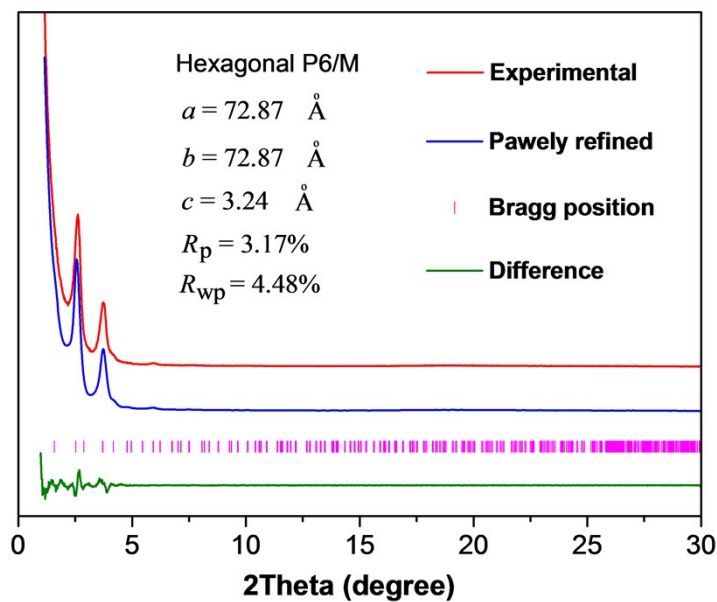

**Figure S3.** PXRD patterns of **htb** type BITA-PDA COF: experimental (red curve), Pawley refined (blue curve) and their difference (green curve). Purple ticks indicate the positions of reflections.

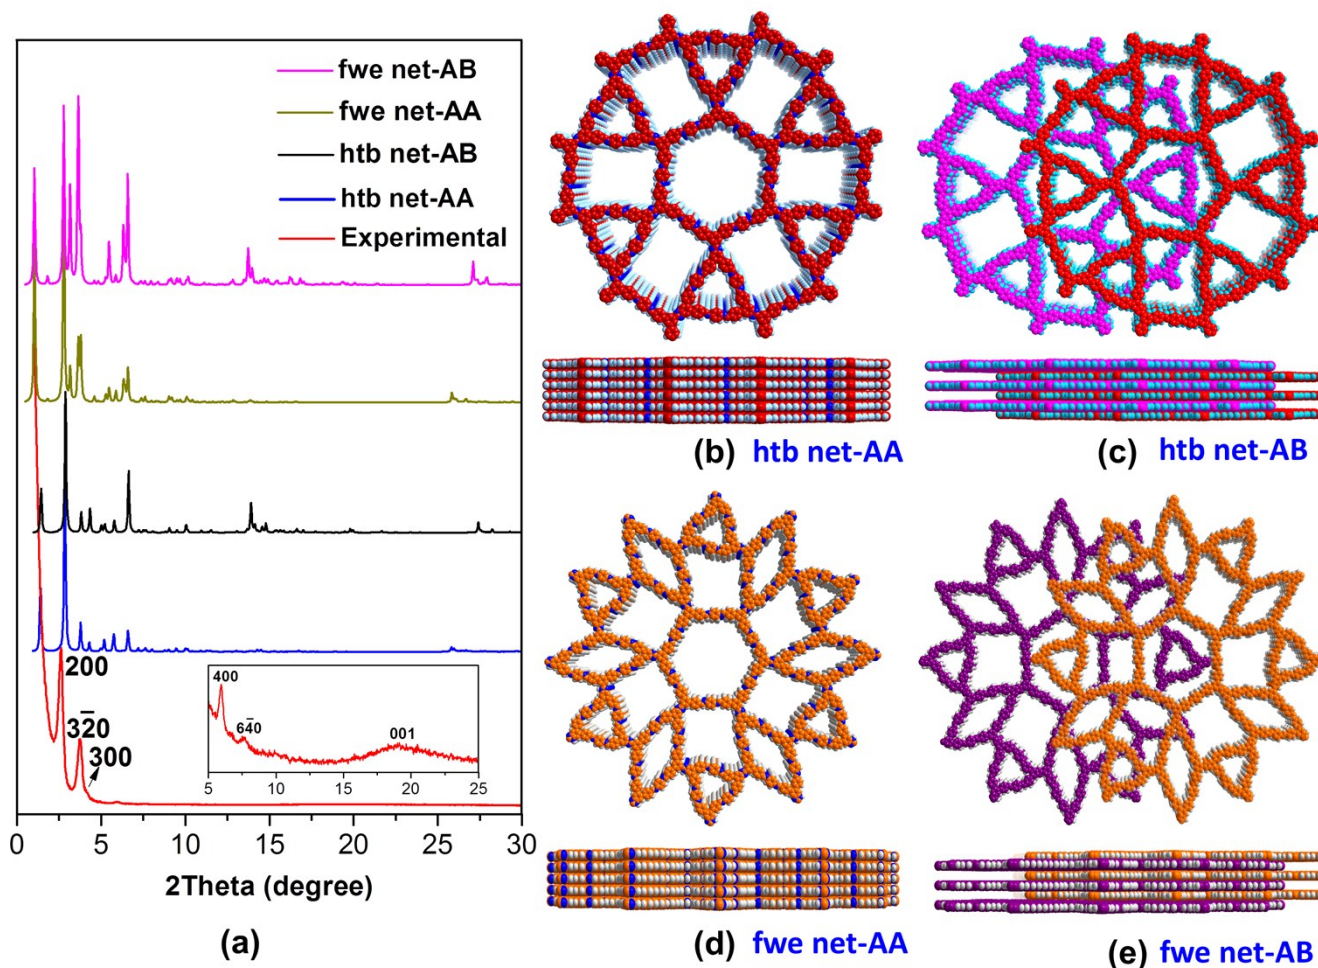

**Figure S4.** (a) Experimental PXRD pattern of BITA-PDA COF (red); Simulated PXRD patterns of BITA-PDA COF exhibiting an **htb** or **fwe** net topology. Space-filling models of BITA-PDA COF showing an **htb** or **fwe** net topology in (b, d) AA packing mode and (c, e) AB packing mode.

#### Section S4. Fourier-transform infrared (FT-IR) spectra.

The FT-IR spectra of starting materials including the building block BITA and 1,4-diaminobenzene (PDA), and the target product of the **htb** type BITA-PDA COF were determined on a Nicolet FT-IR-170SX spectrophotometer with KBr pellets in the range of 500–4000  $\text{cm}^{-1}$ .

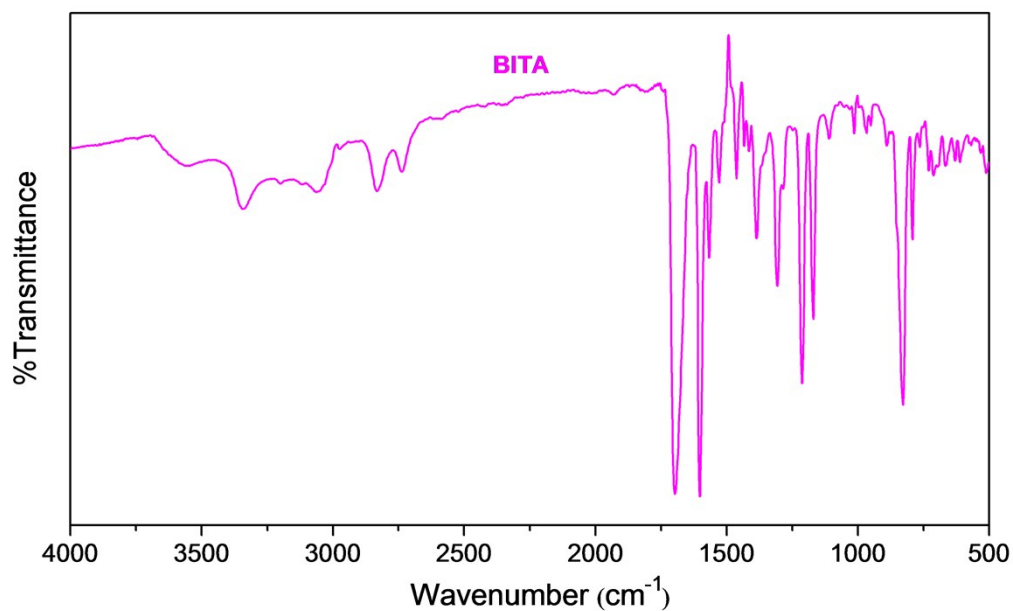

Figure S5. FT-IR spectrum of the building block BITA.

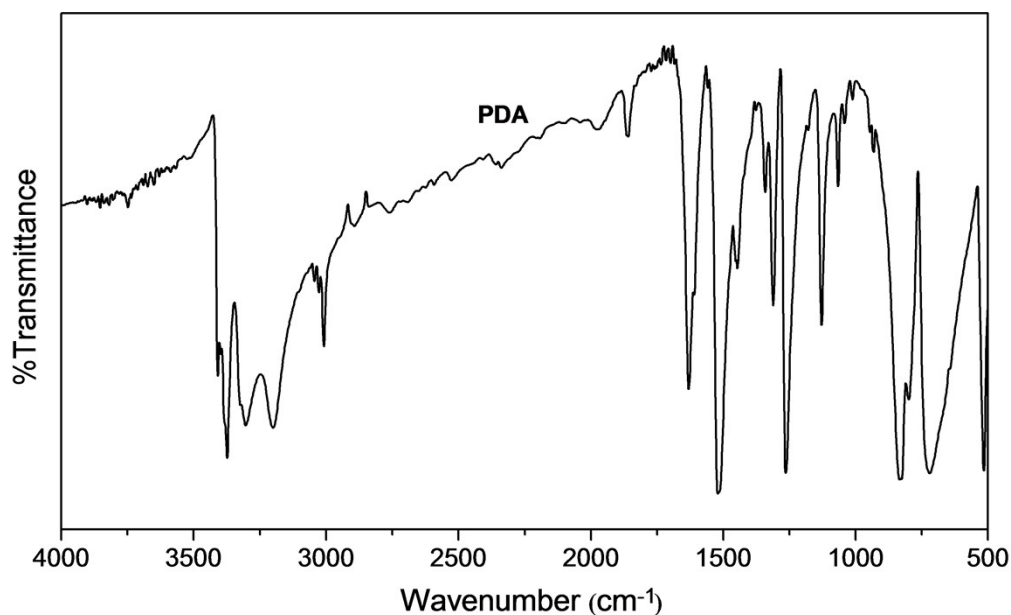

Figure S6. FT-IR spectrum of 1,4-diaminobenzene (PDA).



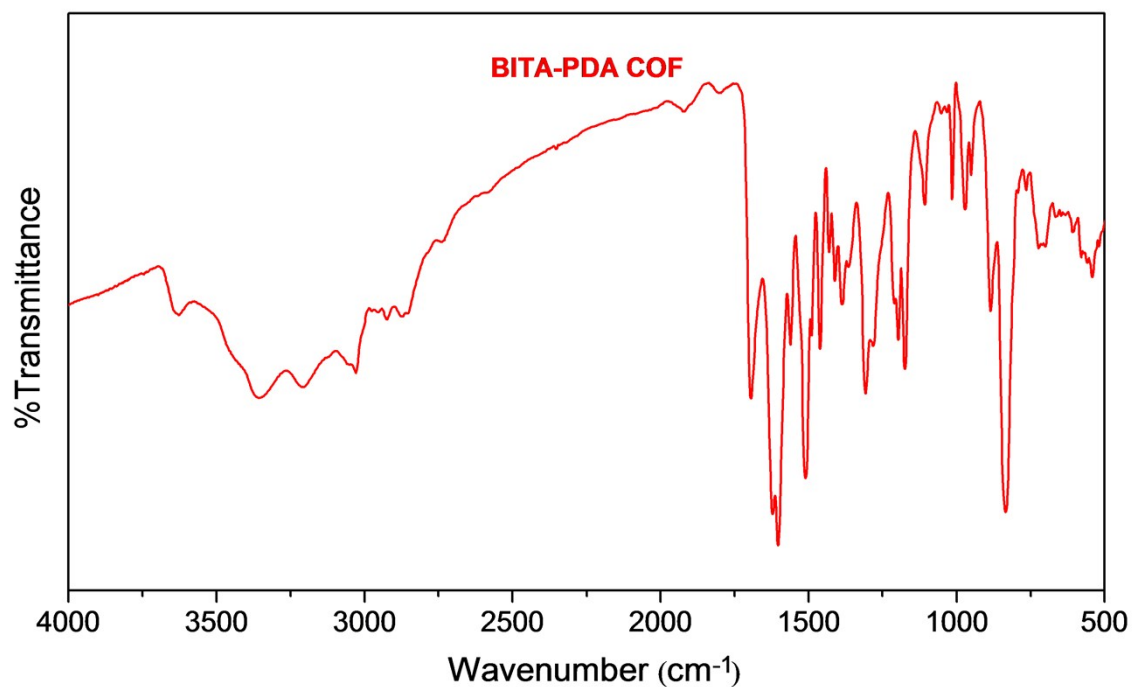

**Figure S7.** FT-IR spectrum of the **htb** type BITA-PDA COF.

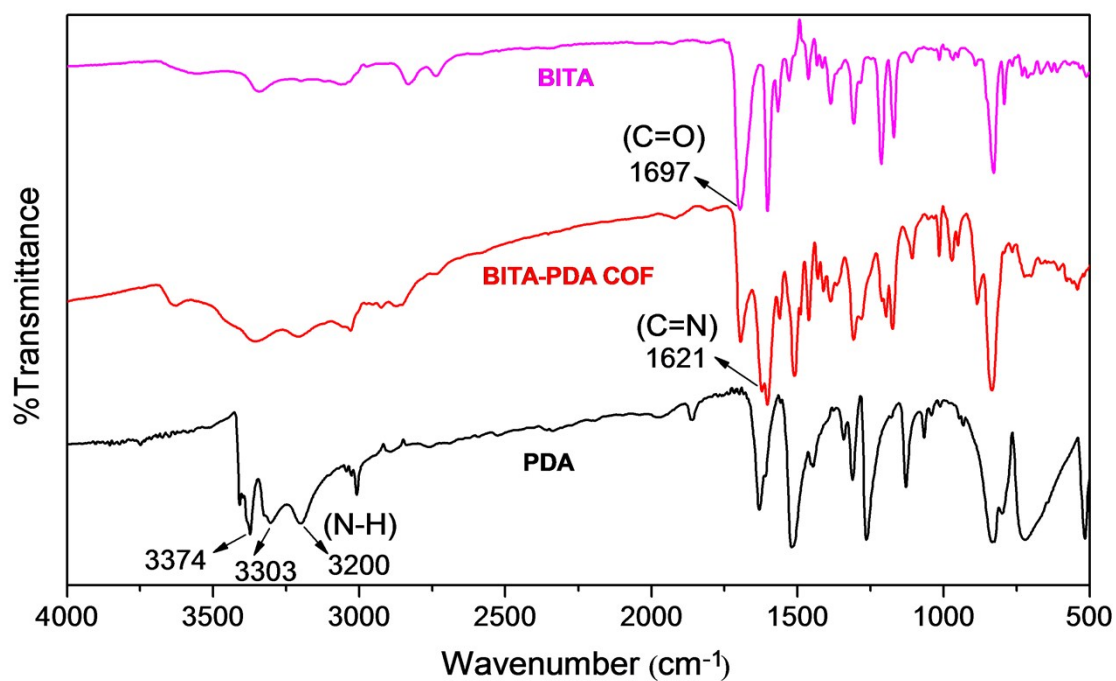

**Figure S8.** Stack plot of the FT-IR spectra for the comparison between starting materials of BITA and PDA, and the resulting **htb** type BITA-PDA COF.

*Section S5. Solid-state nuclear magnetic resonance (SSNMR) spectroscopy.*

The solid-state nuclear magnetic resonance (SSNMR) spectrum was acquired at ambient pressure on an Agilent-NMR-vnmrs 600 spectrometer (Agilent Technologies, Santa Clara, CA, USA). The spectrum was recorded at a resonance frequency of 150.15 MHz using a 4-mm magic angle-spinning (MAS) NMR probe with a spinning rate of 15 kHz at room temperature. The recycle delay was 5 s, and the accumulation number was set to be 2048.

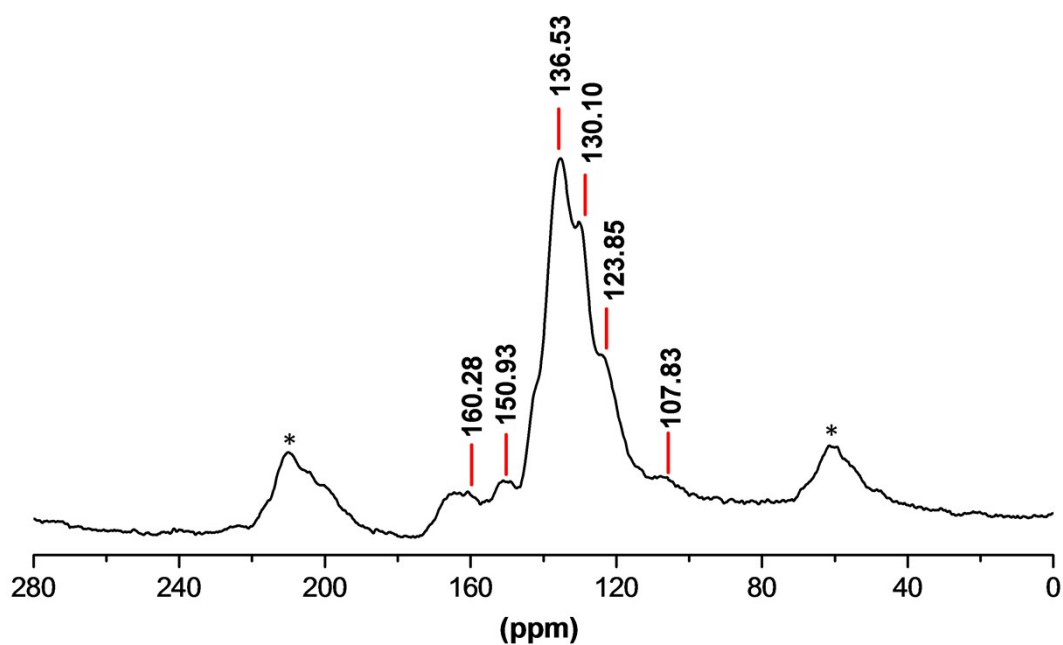

**Figure S9.** Solid state  $^{13}\text{C}$  NMR spectrum of BITA-DPA COF.

*Section S6. Scanning electron microscopy (SEM).*

Scanning electron microscopy (SEM) images were recorded on a MAIA3 TESCAN Analytical Scanning Electron Microscope (USA) using an accelerating voltage of 4.0 kV.

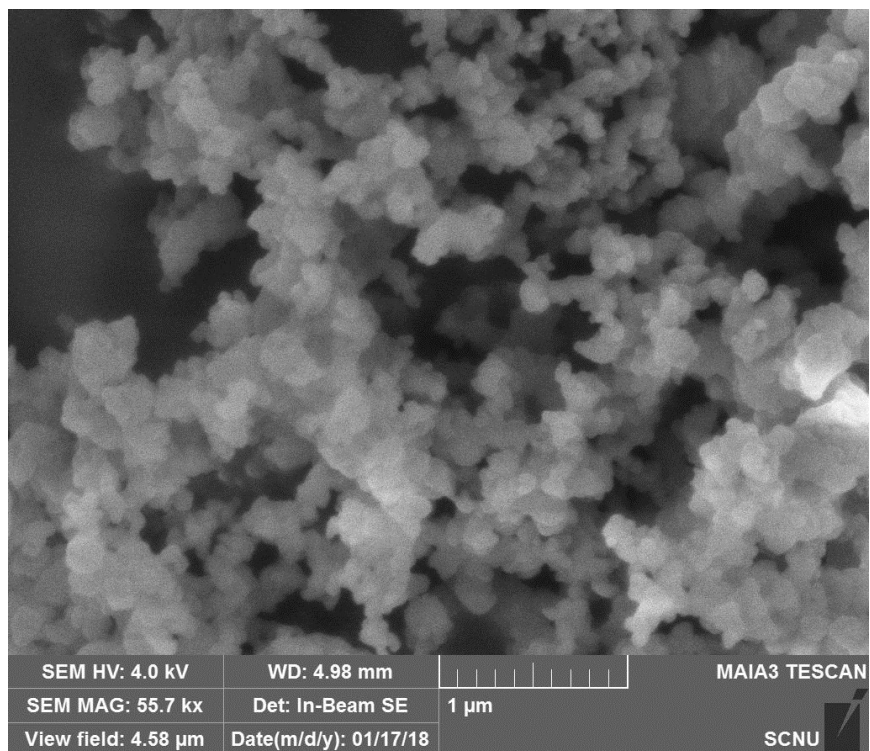

**Figure S10.** SEM image of BITA-PDA COF.

**Section S6. Thermogravimetric analysis (TGA).**

Thermogravimetric analysis (TGA) was measured by employing on a Perkin-Elmer TGA7 analyzer from room temperature to 800 °C at a heating rate of 10 °C/min under an air atmosphere.

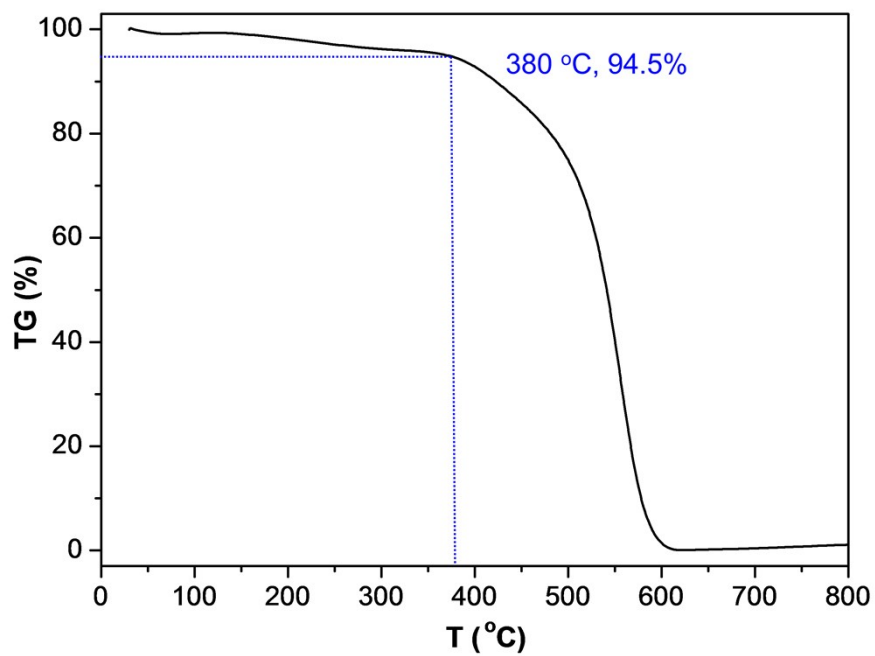

**Figure S11.** TGA curve of BITA-DPA COF.

### Section 8. Nitrogen adsorption-desorption measurement.

Nitrogen adsorption-desorption measurement was conducted by using an ASAP 2020 Plus gas adsorption instrument (Micromeritics, USA). The cryogenic temperature of 77 K required for nitrogen sorption test was controlled using liquid nitrogen bath. The initial outgassing process for the sample was carried out under a dynamic vacuum (about  $10^{-5}$  torr) at 120 °C for 12 h. The desolvated sample and sample tube were precisely weighed and transferred to the analyzer. Both the Brunauer-Emmett-Teller (BET) model and Langmuir model were utilized to evaluate the specific surface areas.

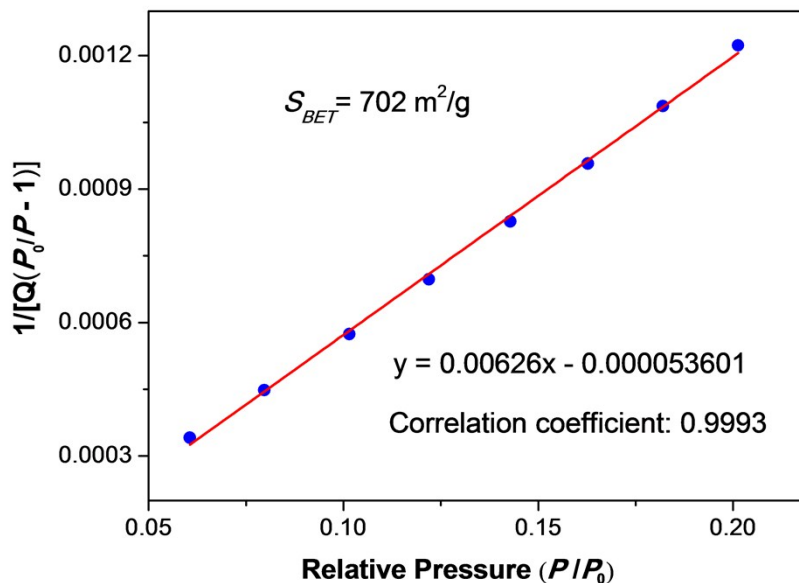

Figure S12. BET surface area plot for the **htb** type BITA-PDA COF calculated from the isotherm.

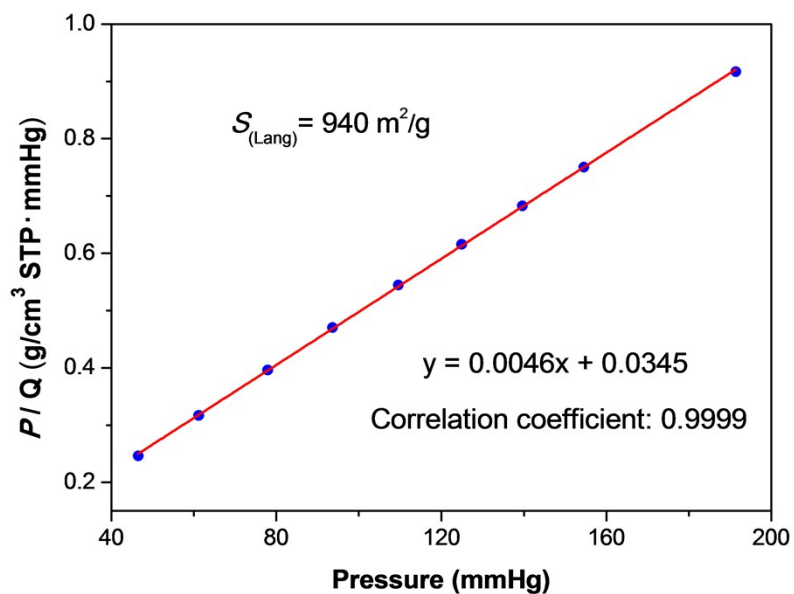

Figure S13. Langmuir surface area plot for the **htb** type BITA-PDA COF calculated from the isotherm.

### Section S9. Fluorescence spectroscopy

Fluorescence spectra were measured at ambient temperature employing a Hitachi F-4600 fluorescence spectrophotometer (Hitachi, Japan) with a PMT voltage being 700 V and a scan speed being 1200 nm/min, and the slit width for both excitation and emission was set to 5 nm. For the fluorescence measurements, the fine powder of BITA-PDA COF was immersed in dimethylformamide (DMF) and then ultrasonicated for a couple of hours to obtain almost transparent suspensions. All the emission spectra of BITA-PDA COF suspensions before and after the addition of metal ions were recorded from 390 to 600 nm upon excitation at 322 nm. The fluorescence quenching efficiency was estimated employing Stern–Volmer equation,  $I_0/I = K_{SV}[M] + 1$ , in which  $I$  and  $I_0$  are the luminescence intensity with and without addition of  $Fe^{3+}$  cations, respectively,  $K_{SV}$  represents the quenching constant and  $[M]$  is the concentration of  $Fe^{3+}$  cations.

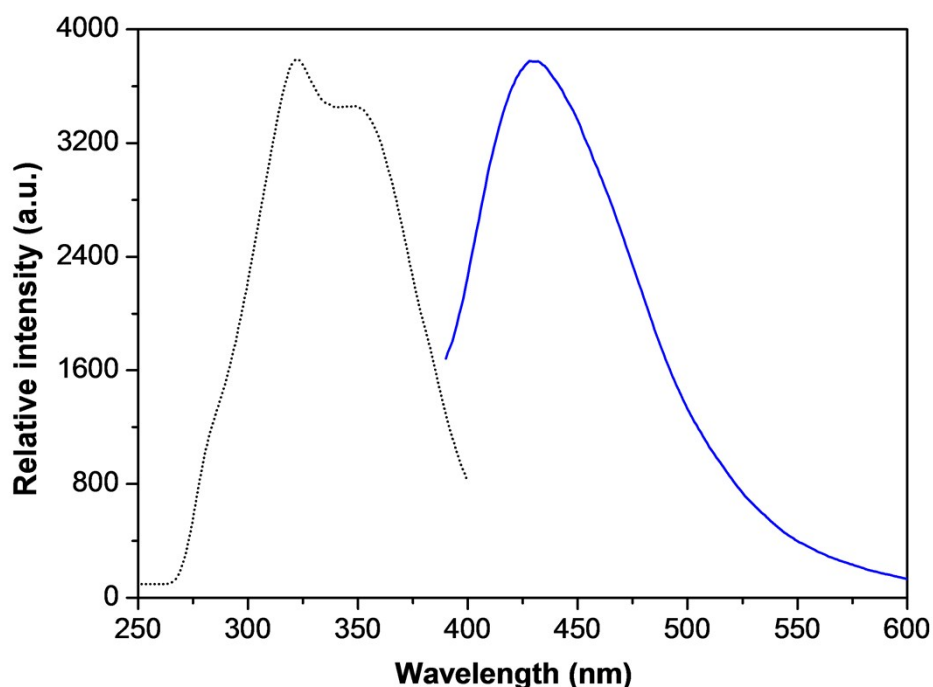

**Figure S14.** Excitation ( $\lambda_{em} = 432$  nm) and emission ( $\lambda_{ex} = 322$  nm) spectra of BITA-PDA COF (10 mg / L) in DMF suspension.

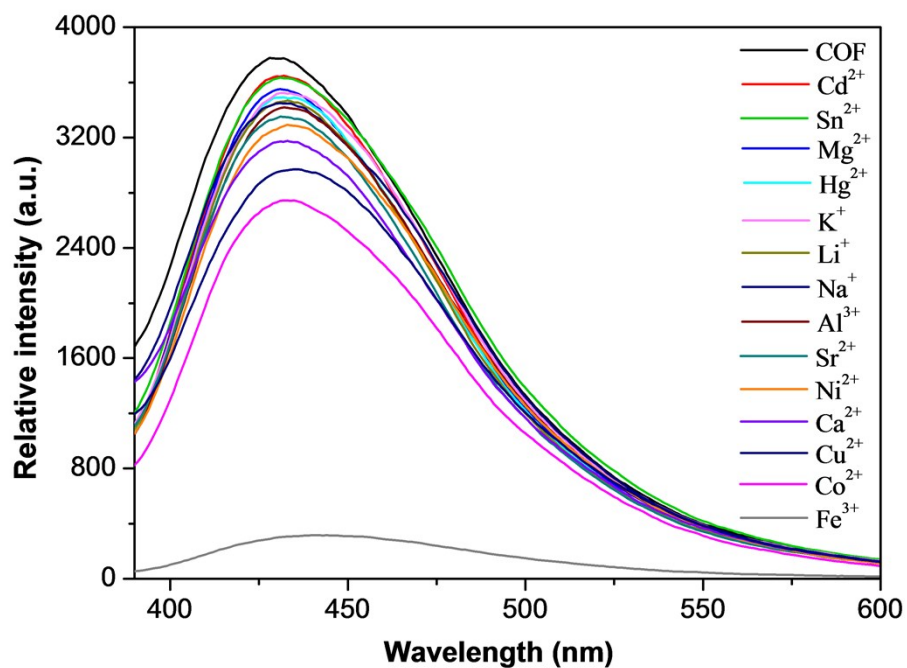

**Figure S15.** Emission spectra ( $\lambda_{\text{ex}} = 322 \text{ nm}$ ) of BITA-PDA COF in DMF suspensions containing  $1 \times 10^{-4} \text{ mol/L}$  of  $\text{Cd}^{2+}$ ,  $\text{Sn}^{2+}$ ,  $\text{Mg}^{2+}$ ,  $\text{Hg}^{2+}$ ,  $\text{K}^+$ ,  $\text{Li}^+$ ,  $\text{Na}^+$ ,  $\text{Al}^{3+}$ ,  $\text{Sr}^{2+}$ ,  $\text{Ni}^{2+}$ ,  $\text{Ca}^{2+}$ ,  $\text{Cu}^{2+}$ ,  $\text{Co}^{2+}$  and  $\text{Fe}^{3+}$ , respectively.

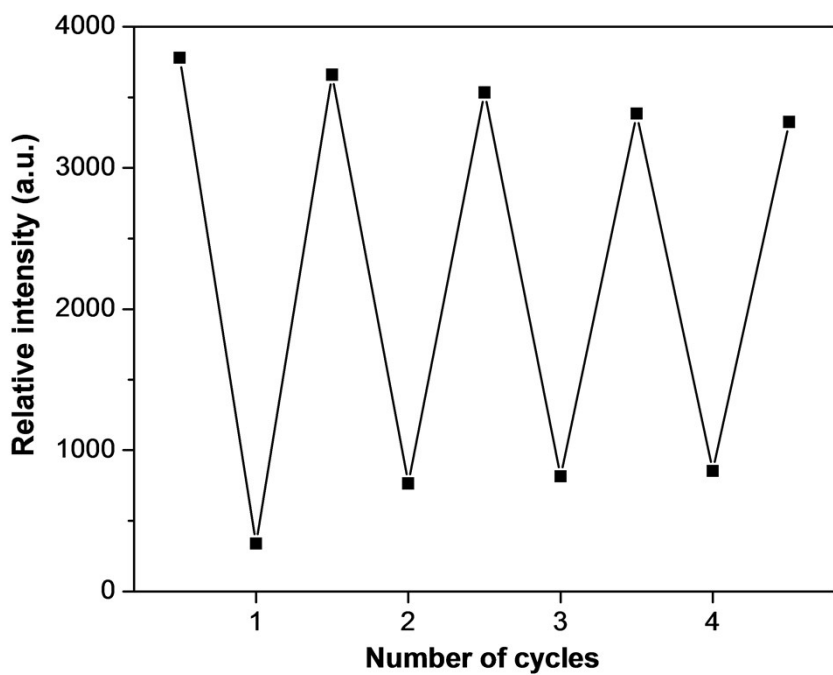

**Figure S16.** Recycled use of the BITA-PDA COF for the detection of  $\text{Fe}^{3+}$  ions.

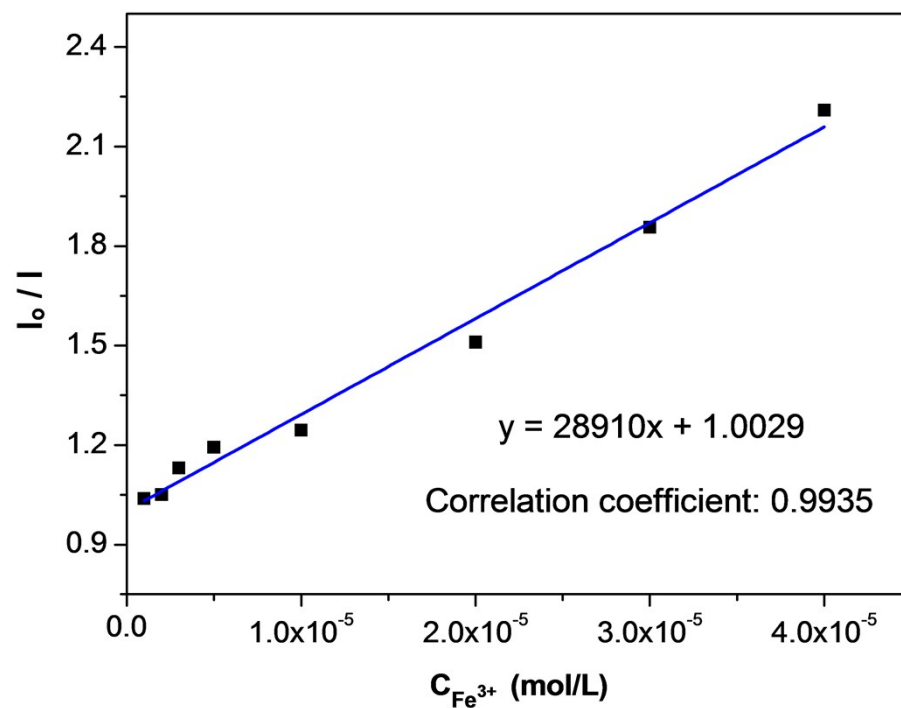

**Figure S17.** Stern–Volmer plot of photoluminescent quenching efficiency ( $I_0/I$ ) versus  $Fe^{3+}$  concentration in the BITA-PDA COF suspension.



### Section S10. X-ray photoelectron spectroscopy (XPS)

The Fe 2p X-ray photoelectron spectroscopy (XPS) experiment of the Fe<sup>3+</sup>-incorporated BITA-PDA COF was carried out on an ESCALAB 250 instrument (XPS, ESCALAB 250, Thermo Scientific, America) by employing aluminum K $\alpha$  X-ray radiation under ultra-high vacuum. The BITA-PDA COF powder was firstly immersed in a DMF solution containing 10<sup>-2</sup> mol/L Fe<sup>3+</sup> ion for overnight, then collected by filtration, washed with DMF several times and dried under vacuum, and the resulting Fe<sup>3+</sup>-incorporated BITA-PDA COF sample was finally subjected to XPS study.

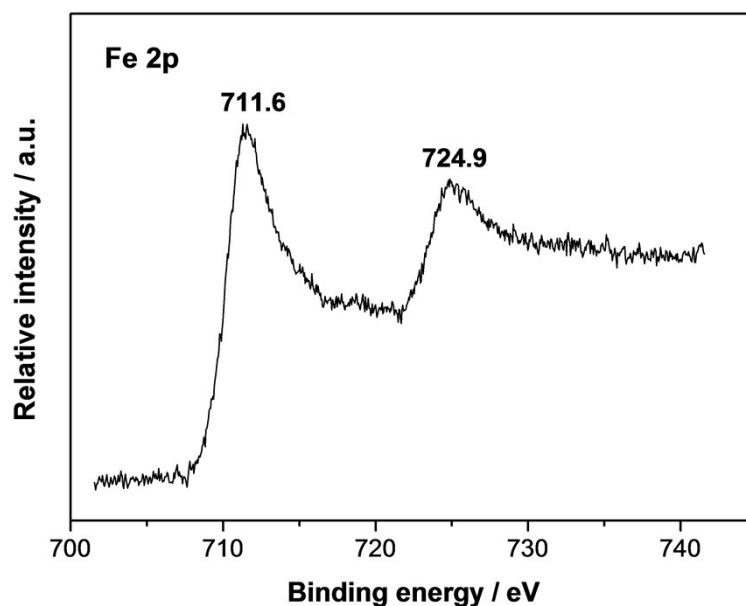

**Figure S18.** The Fe 2p XPS spectrum of the Fe<sup>3+</sup>-incorporated BITA-PDA COF sample.

**Section S11.** Proton and carbon nuclear magnetic resonance ( $^1\text{H-NMR}$  and  $^{13}\text{C-NMR}$ ) spectra.

Liquid proton and carbon nuclear magnetic resonance ( $^1\text{H-NMR}$  and  $^{13}\text{C-NMR}$ ) spectra were recorded on a Varian 400 (400 MHz) NMR spectrometer at 298 K, utilizing the deuterated solvent as lock and tetramethylsilane as an internal standard. All chemical shifts are quoted using the  $\delta$  scale, and all coupling constants ( $J$ ) are expressed in Hertz (Hz).

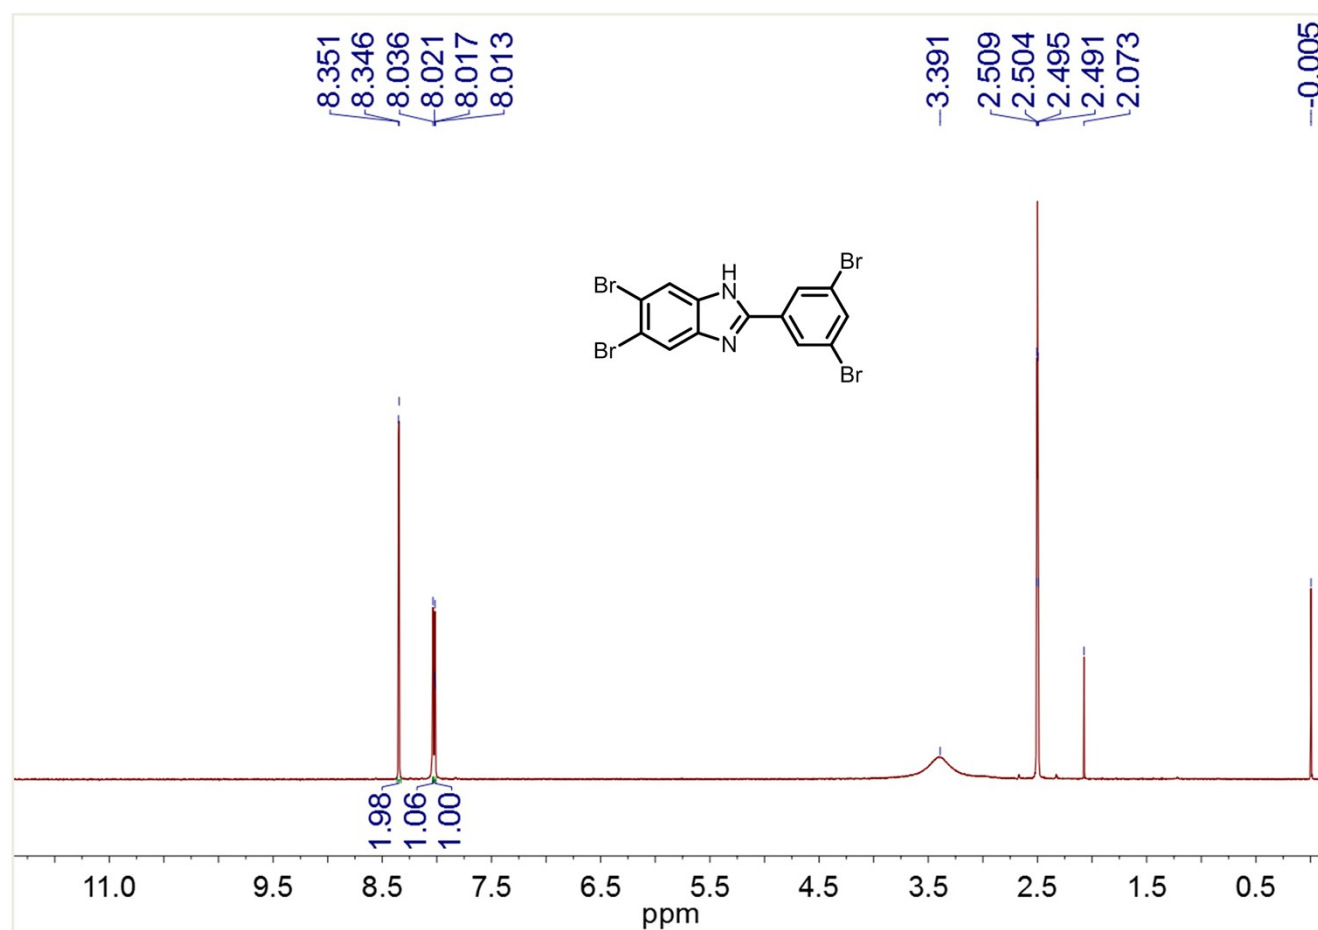

**Figure S19.**  $^1\text{H}$  NMR spectrum (DMSO- $d_6$ , 298 K, 400 MHz) of compound 1.

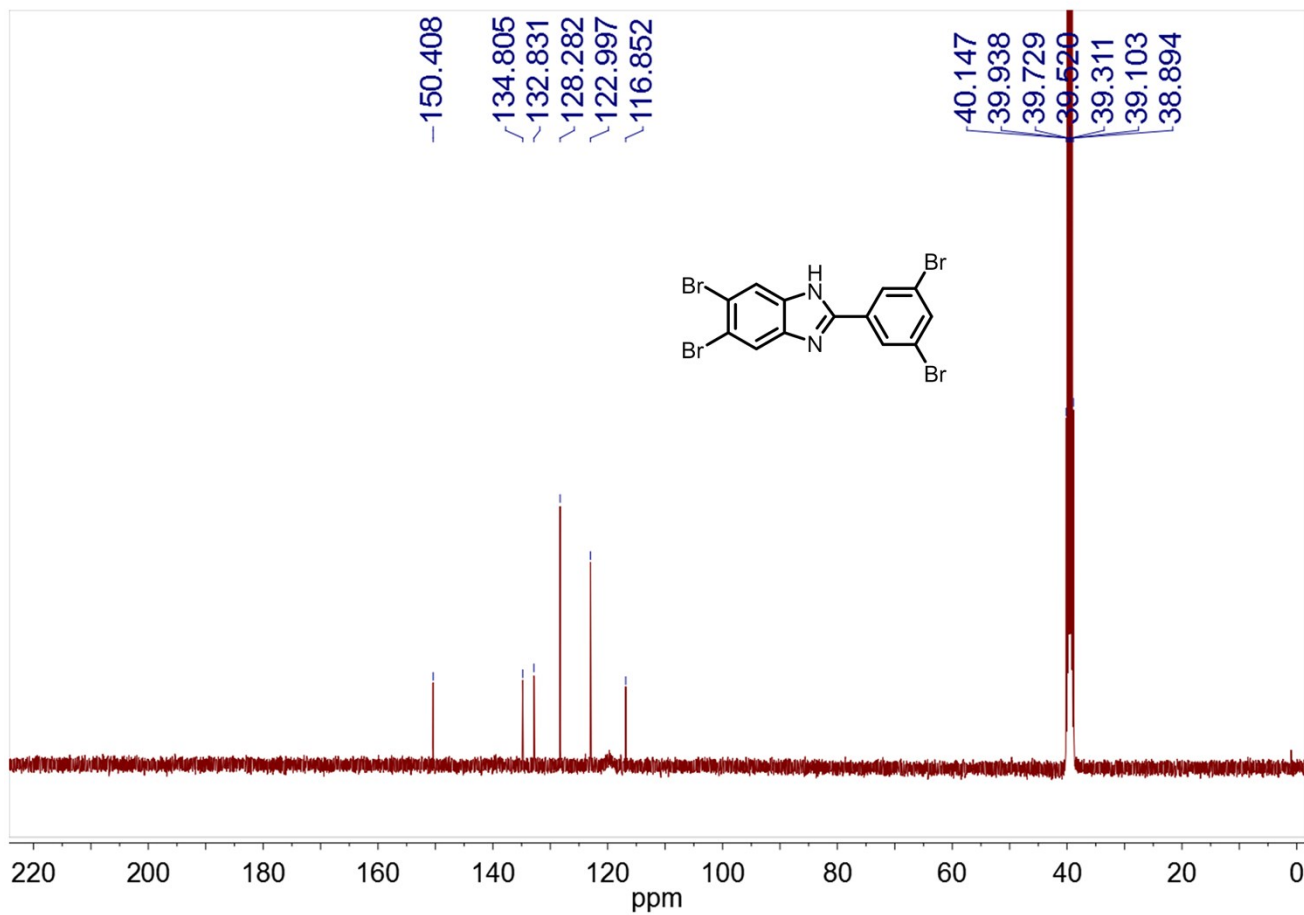

**Figure S20.**  $^{13}\text{C}$  NMR spectrum ( $\text{DMSO-}d_6$ , 298 K, 100 MHz) of compound **1**.

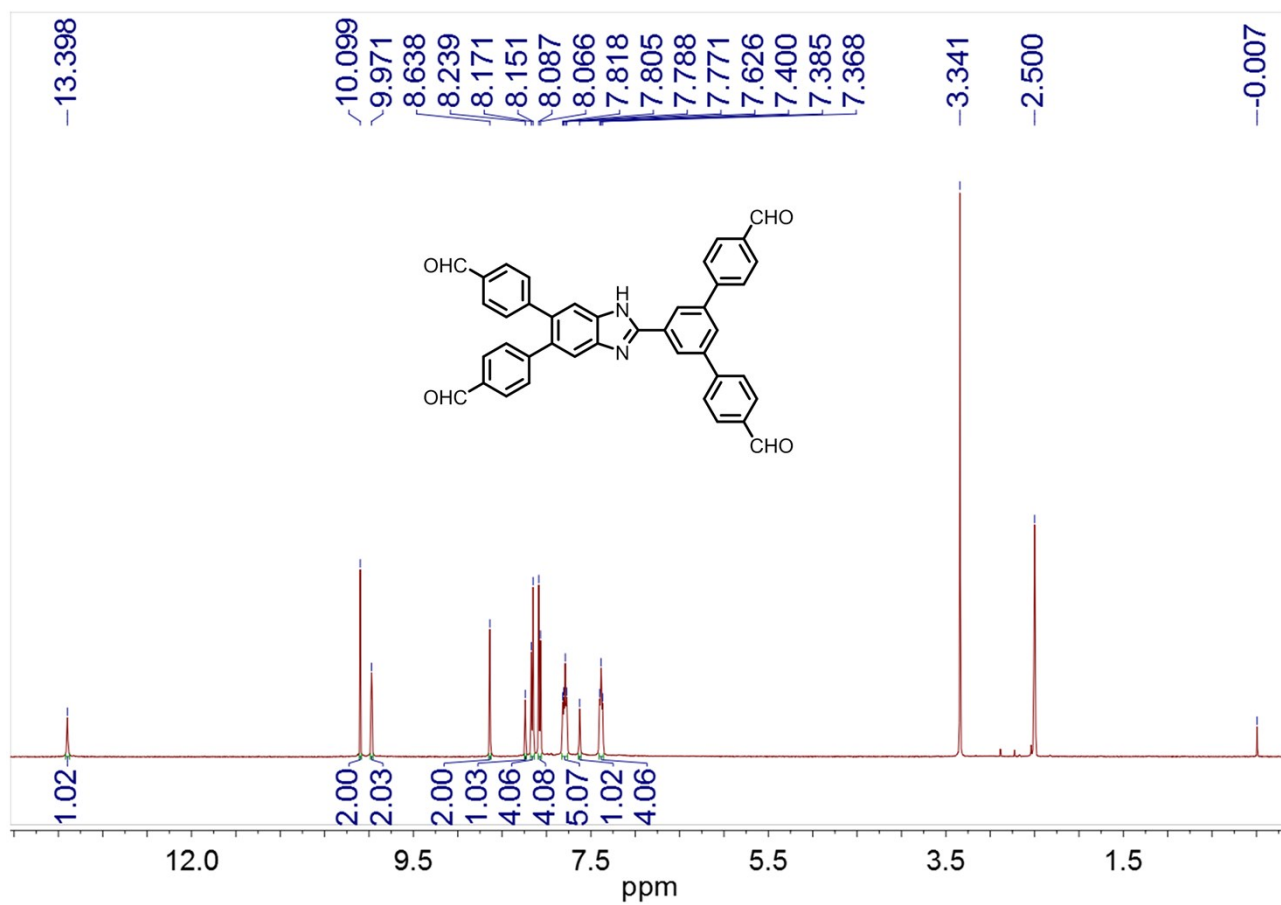

**Figure S21.** <sup>1</sup>H NMR spectrum (DMSO-*d*<sub>6</sub>, 298 K, 400 MHz) of the building block BITA.

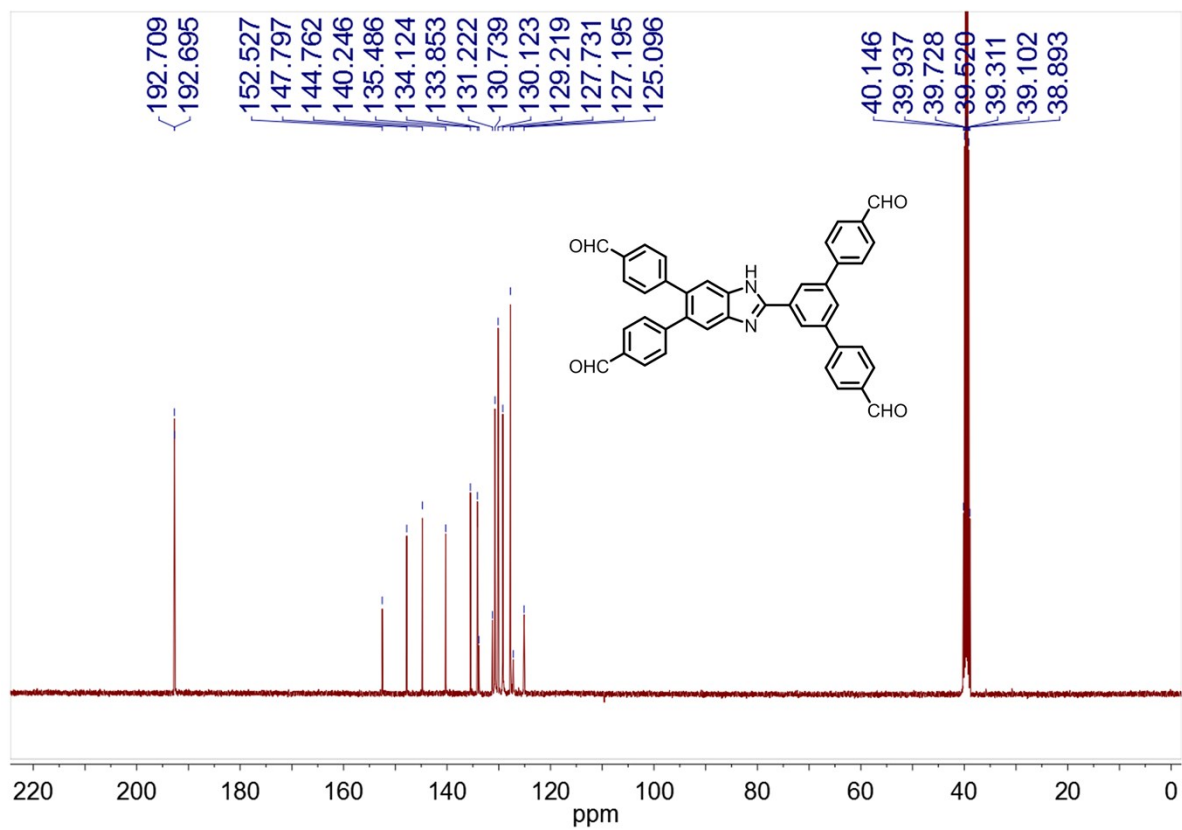

**Figure S22.**  $^{13}\text{C}$  NMR spectrum (DMSO- $d_6$ , 298 K, 100 MHz) of the building block BITA.

## Section S12. Mass spectra (MS)

Mass detections were recorded by employing an LC-MS instrument equipped with a Waters SQ detector through an electrospray ionization (ESI) interface. Measurements were carried out in positive ion mode for compound **1** and negative ion mode for the building block BITA. To better obtain the fragment ions, cone voltage was set at 42 V. Other MS detection conditions were as follows: capillary voltage, 3.0 kV; source temperature, 120 °C; desolvation temperature, 350 °C; and desolvation gas flow was 500 L/h.

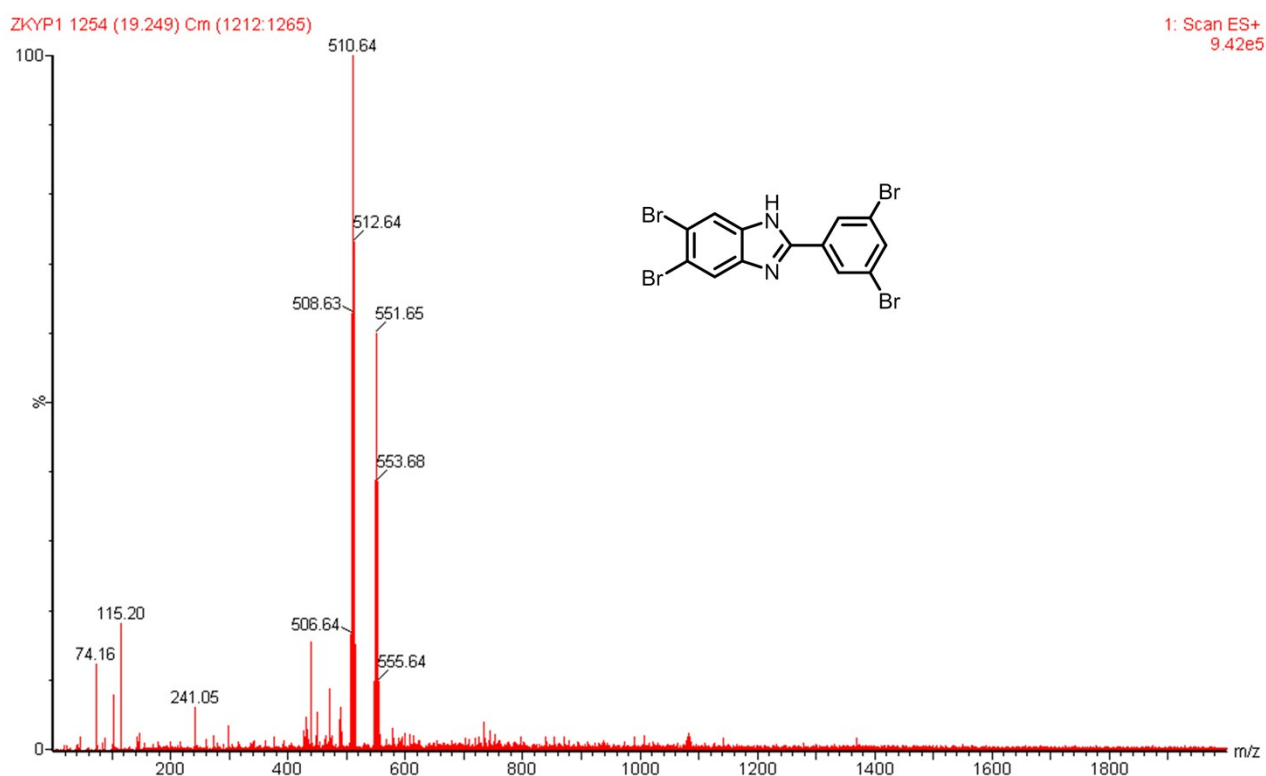

Figure S23. MS of compound **1**.



**Table S1.** Fractional atomic coordinates for the unit cell of the **htb** type BITA-PDA COF with AA packing.

| <b>htb</b> type BITA-PDA COF with AA packing      |         |         |         |
|---------------------------------------------------|---------|---------|---------|
| Space group: <i>P6/M</i> (No. 175)                |         |         |         |
| $a = b = 70.26 \text{ \AA}, c = 3.44 \text{ \AA}$ |         |         |         |
| $\alpha = \beta = 90^\circ, \gamma = 120^\circ$   |         |         |         |
| $V = 14712 \text{ \AA}^3$                         |         |         |         |
| Atom                                              | x/a     | y/b     | z/c     |
| C1                                                | 0.20849 | 0.45737 | 0.00000 |
| C2                                                | 0.21046 | 0.43894 | 0.00000 |
| C3                                                | 0.24932 | 0.48018 | 0.00000 |
| N4                                                | 0.22697 | 0.41844 | 0.00000 |
| C5                                                | 0.20909 | 0.37144 | 0.00000 |
| C6                                                | 0.20026 | 0.34847 | 0.00000 |
| C7                                                | 0.21843 | 0.49740 | 0.00000 |
| C8                                                | 0.13796 | 0.32942 | 0.00000 |
| C9                                                | 0.23051 | 0.52120 | 0.00000 |
| C10                                               | 0.22111 | 0.53459 | 0.00000 |
| C11                                               | 0.19861 | 0.52607 | 0.00000 |
| C12                                               | 0.18553 | 0.50347 | 0.00000 |
| C13                                               | 0.19492 | 0.48982 | 0.00000 |
| C14                                               | 0.23833 | 0.35167 | 0.00000 |
| C15                                               | 0.25191 | 0.34242 | 0.00000 |
| C16                                               | 0.24295 | 0.31966 | 0.00000 |
| C17                                               | 0.22008 | 0.30619 | 0.00000 |
| C18                                               | 0.20641 | 0.31532 | 0.00000 |
| C19                                               | 0.37826 | 0.58024 | 0.00000 |
| C20                                               | 0.37896 | 0.60069 | 0.00000 |
| C21                                               | 0.41858 | 0.60032 | 0.00000 |
| C22                                               | 0.26169 | 0.27757 | 0.00000 |
| C23                                               | 0.24967 | 0.25459 | 0.00000 |
| C24                                               | 0.29547 | 0.27591 | 0.00000 |
| C25                                               | 0.20576 | 0.40525 | 0.00000 |
| C26                                               | 0.19565 | 0.38091 | 0.00000 |
| C27                                               | 0.17707 | 0.33524 | 0.00000 |
| C28                                               | 0.22970 | 0.43991 | 0.00000 |
| C29                                               | 0.24884 | 0.45949 | 0.00000 |
| C30                                               | 0.22700 | 0.47962 | 0.00000 |
| N31                                               | 0.19355 | 0.41665 | 0.00000 |
| C32                                               | 0.16287 | 0.34412 | 0.00000 |
| C33                                               | 0.17280 | 0.36724 | 0.00000 |
| C34                                               | 0.27371 | 0.49927 | 0.00000 |
| C35                                               | 0.21508 | 0.33841 | 0.00000 |
| C36                                               | 0.29331 | 0.49742 | 0.00000 |
| C37                                               | 0.31466 | 0.51613 | 0.00000 |



|     |         |         |         |
|-----|---------|---------|---------|
| C38 | 0.31723 | 0.53721 | 0.00000 |
| C39 | 0.29841 | 0.53895 | 0.00000 |
| C40 | 0.27793 | 0.52026 | 0.00000 |
| C41 | 0.12777 | 0.30615 | 0.00000 |
| C42 | 0.10493 | 0.29276 | 0.00000 |
| C43 | 0.09129 | 0.30192 | 0.00000 |
| C44 | 0.10089 | 0.32481 | 0.00000 |
| C45 | 0.12373 | 0.33831 | 0.00000 |
| C46 | 0.39880 | 0.62022 | 0.00000 |
| C47 | 0.41864 | 0.62035 | 0.00000 |
| C48 | 0.39838 | 0.58035 | 0.00000 |
| C49 | 0.26031 | 0.24228 | 0.00000 |
| C50 | 0.28344 | 0.25292 | 0.00000 |
| C51 | 0.28482 | 0.28822 | 0.00000 |
| C52 | 0.78044 | 0.33843 | 0.00000 |
| N53 | 0.79821 | 0.35769 | 0.00000 |
| N54 | 0.79627 | 0.43788 | 0.00000 |
| C55 | 0.81040 | 0.45876 | 0.00000 |
| N56 | 0.29545 | 0.24129 | 0.00000 |
| C57 | 0.28733 | 0.22012 | 0.00000 |
| C58 | 0.25768 | 0.31032 | 0.00000 |
| N59 | 0.24966 | 0.28917 | 0.00000 |
| H60 | 0.19157 | 0.45228 | 0.00000 |
| H61 | 0.22651 | 0.38253 | 0.00000 |
| H62 | 0.24713 | 0.53332 | 0.00000 |
| H63 | 0.23196 | 0.55233 | 0.00000 |
| H64 | 0.16780 | 0.49616 | 0.00000 |
| H65 | 0.18184 | 0.47326 | 0.00000 |
| H66 | 0.24674 | 0.36932 | 0.00000 |
| H67 | 0.26957 | 0.35320 | 0.00000 |
| H68 | 0.21263 | 0.28846 | 0.00000 |
| H69 | 0.18910 | 0.30363 | 0.00000 |
| H70 | 0.36460 | 0.60243 | 0.00000 |
| H71 | 0.43384 | 0.60006 | 0.00000 |
| H72 | 0.23188 | 0.24615 | 0.00000 |
| H73 | 0.31326 | 0.28435 | 0.00000 |
| H74 | 0.17001 | 0.31792 | 0.00000 |
| H75 | 0.26282 | 0.45734 | 0.00000 |
| H76 | 0.17664 | 0.41060 | 0.00000 |
| H77 | 0.16306 | 0.37502 | 0.00000 |
| H78 | 0.29345 | 0.48223 | 0.00000 |
| H79 | 0.32894 | 0.51408 | 0.00000 |
| H80 | 0.29936 | 0.55483 | 0.00000 |
| H81 | 0.26475 | 0.52132 | 0.00000 |
| H82 | 0.13681 | 0.29753 | 0.00000 |
| H83 | 0.09788 | 0.27508 | 0.00000 |

|     |         |         |         |
|-----|---------|---------|---------|
| H84 | 0.09075 | 0.33241 | 0.00000 |
| H85 | 0.12955 | 0.35566 | 0.00000 |
| H86 | 0.39876 | 0.63562 | 0.00000 |
| H87 | 0.39839 | 0.56495 | 0.00000 |
| H88 | 0.25022 | 0.22461 | 0.00000 |
| H89 | 0.29489 | 0.30589 | 0.00000 |
| H90 | 0.76446 | 0.33693 | 0.00000 |
| H91 | 0.82791 | 0.46482 | 0.00000 |
| H92 | 0.26980 | 0.20897 | 0.00000 |
| H93 | 0.27520 | 0.32154 | 0.00000 |

**Table S2.** Fractional atomic coordinates for the unit cell of the **htb** type BITA-PDA COF with AB packing.

| <b>htb</b> type BITA-PDA COF with AB packing      |         |         |         |
|---------------------------------------------------|---------|---------|---------|
| Space group: <i>P63/M</i> (No. 176)               |         |         |         |
| $a = b = 70.21 \text{ \AA}, c = 6.49 \text{ \AA}$ |         |         |         |
| $\alpha = \beta = 90^\circ, \gamma = 120^\circ$   |         |         |         |
| $V = 27729 \text{ \AA}^3$                         |         |         |         |
| Atom                                              | $x/a$   | $y/b$   | $z/c$   |
| C1                                                | 1.54537 | 0.12346 | 0.25000 |
| C2                                                | 1.54774 | 0.10525 | 0.25000 |
| C3                                                | 1.58616 | 0.14685 | 0.25000 |
| N4                                                | 1.56471 | 0.08515 | 0.25000 |
| C5                                                | 1.54699 | 0.03796 | 0.25000 |
| C6                                                | 1.53810 | 0.01495 | 0.25000 |
| C7                                                | 1.55450 | 0.16324 | 0.25000 |
| C8                                                | 1.47577 | 0.99607 | 0.25000 |
| C9                                                | 1.56616 | 0.18706 | 0.25000 |
| C10                                               | 1.55631 | 0.20007 | 0.25000 |
| C11                                               | 1.53373 | 0.19111 | 0.25000 |
| C12                                               | 1.52103 | 0.16845 | 0.25000 |
| C13                                               | 1.53087 | 0.15519 | 0.25000 |
| C14                                               | 1.57617 | 0.01805 | 0.25000 |
| C15                                               | 1.58968 | 0.00870 | 0.25000 |
| C16                                               | 1.58059 | 0.98589 | 0.25000 |
| C17                                               | 1.55768 | 0.97252 | 0.25000 |
| C18                                               | 1.54410 | 0.98173 | 0.25000 |
| C19                                               | 1.71436 | 0.24890 | 0.25000 |
| C20                                               | 1.71452 | 0.26911 | 0.25000 |
| C21                                               | 1.75471 | 0.26983 | 0.25000 |
| C22                                               | 1.59829 | 0.94298 | 0.25000 |

|     |         |         |         |
|-----|---------|---------|---------|
| C23 | 1.58576 | 0.92000 | 0.25000 |
| C24 | 1.63153 | 0.94033 | 0.25000 |
| C25 | 1.54352 | 0.07175 | 0.25000 |
| C26 | 1.53355 | 0.04742 | 0.25000 |
| C27 | 1.51486 | 0.00172 | 0.25000 |
| C28 | 1.56713 | 0.10653 | 0.25000 |
| C29 | 1.58610 | 0.12634 | 0.25000 |
| C30 | 1.56360 | 0.14585 | 0.25000 |
| N31 | 1.53105 | 0.08290 | 0.25000 |
| C32 | 1.50071 | 0.01065 | 0.25000 |
| C33 | 1.51070 | 0.03375 | 0.25000 |
| C34 | 1.61042 | 0.16629 | 0.25000 |
| C35 | 1.55289 | 0.00484 | 0.25000 |
| C36 | 1.63029 | 0.16490 | 0.25000 |
| C37 | 1.65147 | 0.18390 | 0.25000 |
| C38 | 1.65360 | 0.20481 | 0.25000 |
| C39 | 1.63452 | 0.20611 | 0.25000 |
| C40 | 1.61421 | 0.18716 | 0.25000 |
| C41 | 1.46540 | 0.97277 | 0.25000 |
| C42 | 1.44250 | 0.95954 | 0.25000 |
| C43 | 1.42905 | 0.96894 | 0.25000 |
| C44 | 1.43886 | 0.99186 | 0.25000 |
| C45 | 1.46170 | 0.00516 | 0.25000 |
| C46 | 1.73411 | 0.28892 | 0.25000 |
| C47 | 1.75422 | 0.28960 | 0.25000 |
| C48 | 1.73477 | 0.24956 | 0.25000 |
| C49 | 1.59589 | 0.90720 | 0.25000 |
| C50 | 1.61900 | 0.91732 | 0.25000 |
| C51 | 1.62140 | 0.95313 | 0.25000 |
| C52 | 1.11556 | 0.00819 | 0.25000 |
| N53 | 1.13312 | 0.02762 | 0.25000 |
| N54 | 1.12899 | 0.10665 | 0.25000 |
| C55 | 1.14265 | 0.12763 | 0.25000 |
| N56 | 1.63048 | 0.90515 | 0.25000 |
| C57 | 1.62192 | 0.88390 | 0.25000 |
| C58 | 1.59511 | 0.97630 | 0.25000 |
| N59 | 1.58674 | 0.95508 | 0.25000 |
| C60 | 1.12104 | 0.20964 | 0.25000 |
| C61 | 1.11867 | 0.22784 | 0.25000 |
| C62 | 1.08027 | 0.18621 | 0.25000 |
| N63 | 1.10172 | 0.24798 | 0.25000 |

|      |         |         |         |
|------|---------|---------|---------|
| C64  | 1.11966 | 0.29540 | 0.25000 |
| C65  | 1.12872 | 0.31847 | 0.25000 |
| C66  | 1.11201 | 0.16991 | 0.25000 |
| C67  | 1.19101 | 0.33693 | 0.25000 |
| C68  | 1.10042 | 0.14610 | 0.25000 |
| C69  | 1.11036 | 0.13317 | 0.25000 |
| C70  | 1.13297 | 0.14223 | 0.25000 |
| C71  | 1.14558 | 0.16486 | 0.25000 |
| C72  | 1.13565 | 0.17803 | 0.25000 |
| C73  | 1.09081 | 0.31580 | 0.25000 |
| C74  | 1.07745 | 0.32534 | 0.25000 |
| C75  | 1.08669 | 0.34817 | 0.25000 |
| C76  | 1.10961 | 0.36139 | 0.25000 |
| C77  | 1.12305 | 0.35197 | 0.25000 |
| C78  | 1.95205 | 0.08450 | 0.25000 |
| C79  | 1.95187 | 0.06429 | 0.25000 |
| C80  | 1.91171 | 0.06363 | 0.25000 |
| C81  | 1.06905 | 0.39121 | 0.25000 |
| C82  | 1.08155 | 0.41420 | 0.25000 |
| C83  | 1.03577 | 0.39384 | 0.25000 |
| C84  | 1.12293 | 0.26138 | 0.25000 |
| C85  | 1.13299 | 0.28577 | 0.25000 |
| C86  | 1.15199 | 0.33155 | 0.25000 |
| C87  | 1.09928 | 0.22657 | 0.25000 |
| C88  | 1.08032 | 0.20673 | 0.25000 |
| C89  | 1.10283 | 0.18723 | 0.25000 |
| N90  | 1.13536 | 0.25019 | 0.25000 |
| C91  | 1.16602 | 0.32248 | 0.25000 |
| C92  | 1.15587 | 0.29935 | 0.25000 |
| C93  | 1.05602 | 0.16677 | 0.25000 |
| C94  | 1.11410 | 0.32882 | 0.25000 |
| C95  | 1.03618 | 0.16820 | 0.25000 |
| C96  | 1.01499 | 0.14926 | 0.25000 |
| C97  | 1.01281 | 0.12835 | 0.25000 |
| C98  | 1.03185 | 0.12697 | 0.25000 |
| C99  | 1.05218 | 0.14586 | 0.25000 |
| C100 | 1.20153 | 0.36025 | 0.25000 |
| C101 | 1.22444 | 0.37337 | 0.25000 |
| C102 | 1.23781 | 0.36387 | 0.25000 |
| C103 | 1.22786 | 0.34093 | 0.25000 |
| C104 | 1.20499 | 0.32773 | 0.25000 |

|      |         |          |         |
|------|---------|----------|---------|
| C105 | 1.93229 | 0.04452  | 0.25000 |
| C106 | 1.91222 | 0.04386  | 0.25000 |
| C107 | 1.93166 | 0.08389  | 0.25000 |
| C108 | 1.07140 | 0.42698  | 0.25000 |
| C109 | 1.04829 | 0.41684  | 0.25000 |
| C110 | 1.04593 | 0.38105  | 0.25000 |
| C111 | 1.55129 | 0.32542  | 0.25000 |
| N112 | 1.53380 | 0.30594  | 0.25000 |
| N113 | 1.53796 | 0.22684  | 0.25000 |
| C114 | 1.52420 | 0.20586  | 0.25000 |
| N115 | 1.03679 | 0.42899  | 0.25000 |
| C116 | 1.04533 | 0.45024  | 0.25000 |
| C117 | 1.07225 | 0.35790  | 0.25000 |
| N118 | 1.08063 | 0.37913  | 0.25000 |
| H119 | 1.52838 | 0.11806  | 0.25000 |
| H120 | 1.56444 | 0.04905  | 0.25000 |
| H121 | 1.58271 | 0.19940  | 0.25000 |
| H122 | 1.56687 | 0.21787  | 0.25000 |
| H123 | 1.50325 | 0.16080  | 0.25000 |
| H124 | 1.51799 | 0.13852  | 0.25000 |
| H125 | 1.58464 | 0.03572  | 0.25000 |
| H126 | 1.60738 | 0.01941  | 0.25000 |
| H127 | 1.55011 | 0.95477  | 0.25000 |
| H128 | 1.52677 | 0.97009  | 0.25000 |
| H129 | 1.69991 | 0.27045  | 0.25000 |
| H130 | 1.77020 | 0.26999  | 0.25000 |
| H131 | 1.56798 | 0.91195  | 0.25000 |
| H132 | 1.64932 | 0.94837  | 0.25000 |
| H133 | 1.50770 | -0.01563 | 0.25000 |
| H134 | 1.60029 | 0.12451  | 0.25000 |
| H135 | 1.51410 | 0.07672  | 0.25000 |
| H136 | 1.50097 | 0.04153  | 0.25000 |
| H137 | 1.63075 | 0.14986  | 0.25000 |
| H138 | 1.66597 | 0.18218  | 0.25000 |
| H139 | 1.63512 | 0.22184  | 0.25000 |
| H140 | 1.60084 | 0.18795  | 0.25000 |
| H141 | 1.47434 | 0.96405  | 0.25000 |
| H142 | 1.43528 | 0.94183  | 0.25000 |
| H143 | 1.42889 | 0.99965  | 0.25000 |
| H144 | 1.46759 | 0.02252  | 0.25000 |
| H145 | 1.73363 | 0.30412  | 0.25000 |

|      |         |         |         |
|------|---------|---------|---------|
| H146 | 1.73521 | 0.23437 | 0.25000 |
| H147 | 1.58543 | 0.88955 | 0.25000 |
| H148 | 1.63180 | 0.97079 | 0.25000 |
| H149 | 1.09943 | 0.00634 | 0.25000 |
| H150 | 1.16026 | 0.13416 | 0.25000 |
| H151 | 1.60432 | 0.87304 | 0.25000 |
| H152 | 1.61270 | 0.98730 | 0.25000 |
| H153 | 1.13803 | 0.21508 | 0.25000 |
| H154 | 1.10219 | 0.28440 | 0.25000 |
| H155 | 1.08388 | 0.13377 | 0.25000 |
| H156 | 1.09987 | 0.11537 | 0.25000 |
| H157 | 1.16336 | 0.17257 | 0.25000 |
| H158 | 1.14850 | 0.19471 | 0.25000 |
| H159 | 1.08225 | 0.29812 | 0.25000 |
| H160 | 1.05975 | 0.31474 | 0.25000 |
| H161 | 1.11730 | 0.37915 | 0.25000 |
| H162 | 1.14042 | 0.36351 | 0.25000 |
| H163 | 1.96643 | 0.06290 | 0.25000 |
| H164 | 1.89623 | 0.06347 | 0.25000 |
| H165 | 1.09934 | 0.42227 | 0.25000 |
| H166 | 1.01798 | 0.38579 | 0.25000 |
| H167 | 1.15925 | 0.34892 | 0.25000 |
| H168 | 1.06613 | 0.20856 | 0.25000 |
| H169 | 1.15230 | 0.25634 | 0.25000 |
| H170 | 1.16553 | 0.29148 | 0.25000 |
| H171 | 1.03573 | 0.18324 | 0.25000 |
| H172 | 1.00051 | 0.15101 | 0.25000 |
| H173 | 1.03119 | 0.11121 | 0.25000 |
| H174 | 1.06550 | 0.14496 | 0.25000 |
| H175 | 1.19266 | 0.36906 | 0.25000 |
| H176 | 1.23176 | 0.39110 | 0.25000 |
| H177 | 1.23777 | 0.33306 | 0.25000 |
| H178 | 1.19897 | 0.31034 | 0.25000 |
| H179 | 1.93274 | 0.02931 | 0.25000 |
| H180 | 1.93124 | 0.09910 | 0.25000 |
| H181 | 1.08183 | 0.44463 | 0.25000 |
| H182 | 1.03553 | 0.36339 | 0.25000 |
| H183 | 1.56745 | 0.32732 | 0.25000 |
| H184 | 1.50661 | 0.19941 | 0.25000 |
| H185 | 1.06292 | 0.46113 | 0.25000 |
| H186 | 1.05466 | 0.34693 | 0.25000 |

## ***References:***

- (1) Uzun, S. D.; Unlu, N. A.; Sendur, M.; Kanik, F. E.; Timur, S.; Toppare, L. *Colloid Surf. B.* **2013**, *112*, 74.
- (2) Cai, S. L.; Zhang, K.; Tan, J. B.; Wang, S.; Zheng, S. R.; Fan, J.; Yu, Y.; Zhang, W. G.; Liu, Y. *ACS Macro Lett.* **2016**, *5*, 1348.
- (3) Accelrys Software Inc. *Materials Studio 5.0: Modeling Simulation for Chemical and Material*, San Diego, CA, **2009**.
- (4) O'Keeffe, M.; Peskov, M. A.; Ramsden, S. J.; Yaghi, O. M. *Acc. Chem. Res.* **2008**, *41*, 1782.
